# Supplementary material for: Genome ARTIST: a robust, high-accuracy aligner tool for mapping transposon insertions and self-insertions
Source: PubMed Central journal article supplement (PMC4744444; doi:10.1186/s13100-016-0061-0), 2016-02-05
Supplement: 13100_2016_61_MOESM5_ESM.pdf [file 13100_2016_61_MOESM5_ESM.pdf]

## Additional file 5

**A**

**B**

| Name                  | Location | Position in query | Coordinates            | Annotations                                     |
|-----------------------|----------|-------------------|------------------------|-------------------------------------------------|
| 1 P{lacW}             |          | 1 .. 31           | 31 .. 1 (-)            | lacZY 1<br>5'TIR                                |
| 2 Dmel_r5.57_genes_3R |          | 32 .. 419         | 1439101 .. 1438713 (-) | Spec2 2<br>Atu<br>CR43628<br>and 1 other gene.. |

|                           |                                                                                                                                                                                                                                                                                                                                                                                                                                                                                                                                   |
|---------------------------|-----------------------------------------------------------------------------------------------------------------------------------------------------------------------------------------------------------------------------------------------------------------------------------------------------------------------------------------------------------------------------------------------------------------------------------------------------------------------------------------------------------------------------------|
| Tag Sequence              | From 1 to 31 on the FWD strand                                                                                                                                                                                                                                                                                                                                                                                                                                                                                                    |
| Alignment                 | CGACGGGACCACCTTATGTTATTTTCATCATG<br>CGACGGGACCACCTTATGTTATTTTCATCATG<br>*****                                                                                                                                                                                                                                                                                                                                                                                                                                                     |
| Restriction site          | At position 417                                                                                                                                                                                                                                                                                                                                                                                                                                                                                                                   |
| Map to genome             | Chr: 3R Start: <a href="#">1439101</a> End: 1438713 Dir: rev [ <a href="#">Ensembl Location View</a> ]                                                                                                                                                                                                                                                                                                                                                                                                                            |
| Overlapping genes         | The mapped location overlaps: <a href="#">CG1427</a> , <a href="#">asl</a> , <a href="#">Rga</a> , <a href="#">Atu</a> , <a href="#">Spec2</a> , <a href="#">CG2911</a>                                                                                                                                                                                                                                                                                                                                                           |
| Annotated sequence output | CGACGGGACCACCTTATGTTATTTTCATCATGGTCTAGGCACTGTCACAGTAATCGATAACT<br>TGAAATACGCAAAGAGGTCTTCGCATAGACGCCCCAGATGGCAGCCCAATAACTGTTTTT<br>GTCTATCGATTAAGTAAACAACATTTTTACCAATCGCAAAGGCGAATAAAATGTTGT<br>CTTTAAAGAAAACAATTCGAATATCTTTGAAATATACAGTAATCAATGCACCAAAACCTC<br>CTCGTTGCAAACAACTAATACTACTATCGATACCAACGCTGTCTCGATAGCAGATTTTTACATCC<br>CTAATTCCTGTGTGTTGTATTCTGTGACAGCCACAAAGTTTTTTGCGGAACATTTTTGTG<br>GTACAATTTAAAGCCATTTCGGGCGCTAAAGAATTGTTTACTGCCCTCGATAGTGGATC<br><br>NNN tag sequence NNN genomic sequence NNN restriction site |

**C**

|                           |                                                                                                                                                                                                                                                                                                                                                                                                                                                                                                                              |
|---------------------------|------------------------------------------------------------------------------------------------------------------------------------------------------------------------------------------------------------------------------------------------------------------------------------------------------------------------------------------------------------------------------------------------------------------------------------------------------------------------------------------------------------------------------|
| Tag Sequence              | From 1 to 31 on the FWD strand                                                                                                                                                                                                                                                                                                                                                                                                                                                                                               |
| Alignment                 | CGACGGGACCACCTTATGTTATTTTCATCATG<br>CGACGGGACCACCTTATGTTATTTTCATCATG<br>*****                                                                                                                                                                                                                                                                                                                                                                                                                                                |
| Restriction site          | At position 416                                                                                                                                                                                                                                                                                                                                                                                                                                                                                                              |
| Map to genome             | Chr: 3R Start: <a href="#">1439098</a> End: 1438713 Dir: rev [ <a href="#">Ensembl Location View</a> ]                                                                                                                                                                                                                                                                                                                                                                                                                       |
| Overlapping genes         | The mapped location overlaps: <a href="#">CG1427</a> , <a href="#">asl</a> , <a href="#">Rga</a> , <a href="#">Atu</a> , <a href="#">Spec2</a> , <a href="#">CG2911</a>                                                                                                                                                                                                                                                                                                                                                      |
| Annotated sequence output | CGACGGGACCACCTTATGTTATTTTCATCATGGTLAGGCACTGTCACAGTAATCGATAACT<br>GAAATACGCAAAGAGGTCTTCGCATAGACGCCCCAGATGGCAGCCCAATAACTGTTTTTG<br>TCTATCGATTAAGTAAACAACATTTTTACCAATCGCAAAGGCGAATAAAATGTTGTG<br>TTTAAAGAAAACAATTCGAATATCTTTGAAATATACAGTAATCAATGCACCAAAACCTC<br>TCGTTGCAAACAACTAATACTACTATCGATACCAACGCTGTCTCGATAGCAGATTTTTACATCC<br>TAATTCCTGTGTGTTGTATTCTGTGACAGCCACAAAGTTTTTTGCGGAACATTTTTGTG<br>TACAATTTAAAGCCATTTCGGGCGCTAAAGAATTGTTTACTGCCCTCGATAGTGGATC<br><br>NNN tag sequence NNN genomic sequence NNN restriction site |

A deletion affecting the genomic nucleotide 3 relative to the TIR was simulated for a *P{lacW}* insertion affecting *Atu* gene from *D. melanogaster* [GenBank:HM210951.1]. While Genome ARTIST still reports the coordinate 1439101 as the insertion site (A), iMapper

erroneously displays the T (underlined in red) at the coordinate 1439098 (highlighted with green) as the mapping coordinate for the simulated query sequence (C). Nevertheless, the respective T nucleotide is not intuitively positioned right next to the terminal nucleotide of the TIR (or the tag sequence, highlighted with light green by iMapper). Instead, a G nucleotide, which actually should stand for the real mapping position at 1439101 (B), is somehow confusingly depicted as the one bordering the TIR. Moreover, the deleted nucleotide is explicitly represented by Genome ARTIST, but it cannot be directly inferred from the graphics of iMapper.
